# Supplementary material for: par genes in Mycobacterium bovis and Mycobacterium smegmatis are arranged in an operon transcribed from "SigGC" promoters
Source: PubMed Central journal article supplement (PMC2346475; doi:10.1186/1471-2180-8-51), 2008-03-27

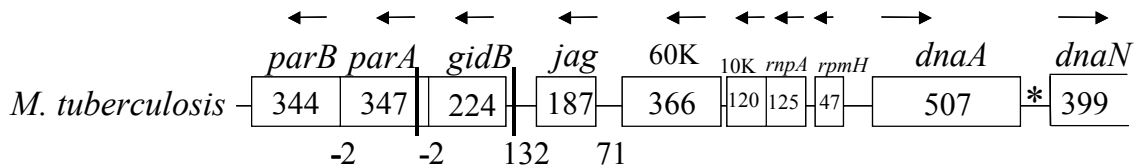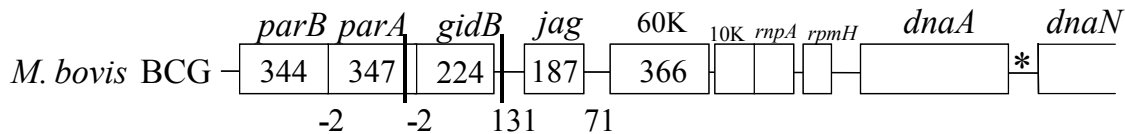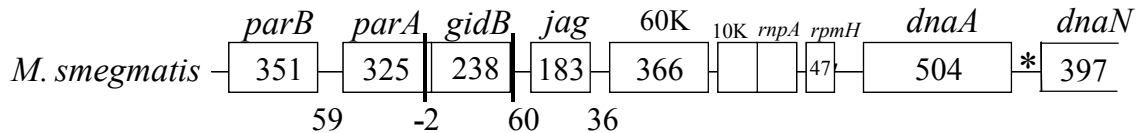

Supplement: 1471-2180-8-51-S1.pdf [file 1471-2180-8-51-S1.pdf]
